# Supplementary material for: ALDH Enzyme Expression Is Independent of the Spermatogenic Cycle, and Their Inhibition Causes Misregulation of Murine Spermatogenic Processes
Source: PubMed Central journal article supplement — Biol Reprod. 2015 Dec 2;94(1):12. doi: 10.1095/biolreprod.115.131458 (PMC4809557; doi:10.1095/biolreprod.115.131458), 2015-12-02
Supplement: supp_115.131458_biolreprod.115.131458-1.pdf [file supp_115.131458_biolreprod.115.131458-1.pdf]

**Kent et al., Supplemental Data**

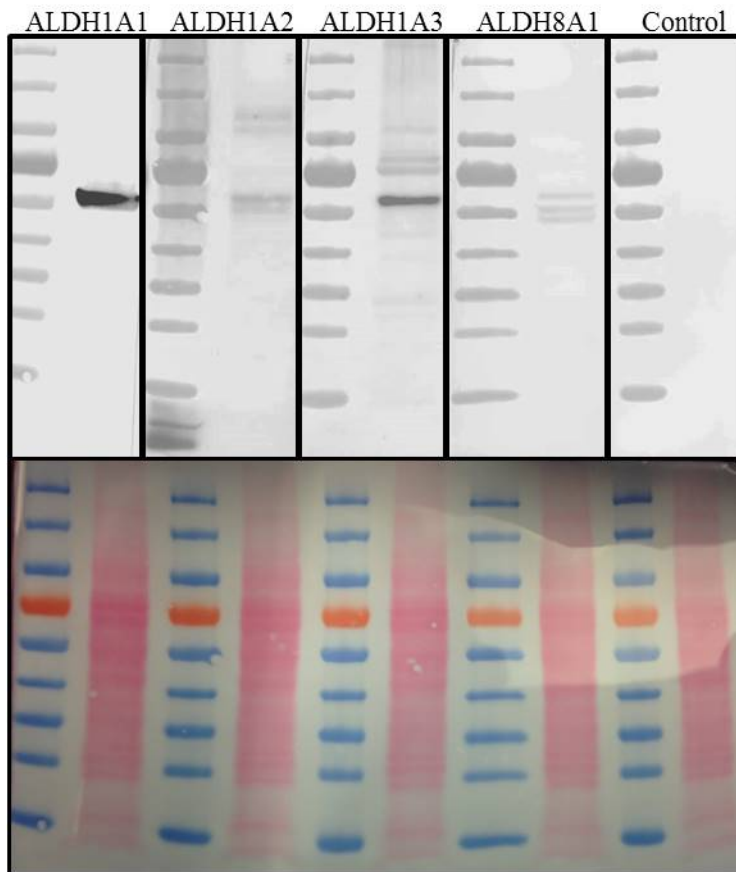

**Supplemental Figure S1. ALDH Western Blots.** Western Blots were performed on protein isolated from adult mouse testis. Bands were detected in all blots at approximately 58 kDA. The expected sizes of ALDH1A1, ALDH 1A2, ALDH1A3, and ALDH8A1 are 54.5, 56.7, 56.2, and 53.7 kDA, respectively. Ponceau staining was used to ensure equal loading.
